# Supplementary material for: NT‐proBNP and Risk of Dementia in a General Japanese Elderly Population: The Hisayama Study
Source: PubMed Central journal article supplement — J Am Heart Assoc. 2019 Aug 24;8(17):e011652. doi: 10.1161/JAHA.118.011652 (PMC6755853; doi:10.1161/jaha.118.011652), 2019-08-24
Supplement: JAH3-8-e011652-s001.pdf [file JAH3-8-e011652-s001.pdf]

# **SUPPLEMENTAL MATERIAL**

**Table S1. Risk of dementia and its subtypes according to quartiles of serum NT-proBNP, 2002 to 2012.**

| NT-proBNP (pg/mL)          | Persons at risk | No. of events | Hazard ratio (95% CI) |                  |                  |
|----------------------------|-----------------|---------------|-----------------------|------------------|------------------|
|                            |                 |               | Model 1               | Model 2          | Model 3          |
| <b>All-cause dementia</b>  |                 |               |                       |                  |                  |
| Q1 ( $\leq 45$ )           | 407             | 35            | 1.00 (reference)      | 1.00 (reference) | 1.00 (reference) |
| Q2 (46–82)                 | 405             | 81            | 1.88 (1.26–2.81)      | 1.78 (1.19–2.67) | 1.79 (1.19–2.67) |
| Q3 (83–153)                | 414             | 105           | 2.12 (1.43–3.14)      | 1.87 (1.26–2.79) | 1.88 (1.27–2.80) |
| Q4 ( $\geq 154$ )          | 409             | 156           | 3.40 (2.32–5.00)      | 2.75 (1.84–4.12) | 2.84 (1.89–4.26) |
| <i>P</i> for trend         |                 |               | <0.001                | <0.001           | <0.001           |
| <b>Alzheimer's disease</b> |                 |               |                       |                  |                  |
| Q1 ( $\leq 45$ )           | 407             | 21            | 1.00 (reference)      | 1.00 (reference) | 1.00 (reference) |
| Q2 (46–82)                 | 405             | 59            | 2.09 (1.27–3.46)      | 1.98 (1.20–3.29) | 1.98 (1.20–3.29) |
| Q3 (83–153)                | 414             | 71            | 2.08 (1.26–3.43)      | 1.92 (1.16–3.17) | 1.94 (1.17–3.20) |
| Q4 ( $\geq 154$ )          | 409             | 96            | 3.05 (1.86–4.99)      | 2.81 (1.68–4.70) | 2.98 (1.78–4.97) |
| <i>P</i> for trend         |                 |               | <0.001                | <0.001           | <0.001           |
| <b>Vascular dementia</b>   |                 |               |                       |                  |                  |
| Q1 ( $\leq 45$ )           | 407             | 9             | 1.00 (reference)      | 1.00 (reference) | 1.00 (reference) |
| Q2 (46–82)                 | 405             | 19            | 1.95 (0.88–4.34)      | 1.84 (0.83–4.12) | 1.85 (0.83–4.13) |
| Q3 (83–153)                | 414             | 22            | 2.12 (0.96–4.70)      | 1.74 (0.78–3.88) | 1.75 (0.79–3.89) |
| Q4 ( $\geq 154$ )          | 409             | 52            | 5.58 (2.66–11.70)     | 3.71 (1.70–8.11) | 3.76 (1.72–8.23) |
| <i>P</i> for trend         |                 |               | <0.001                | <0.001           | <0.001           |

CI, confidence interval; NT-proBNP, N-terminal pro-B-type natriuretic peptide.

Model 1: adjusted for age and sex.

Model 2: adjusted for age, sex, education level, systolic blood pressure, use of antihypertensive agents, use of heart disease agents, diabetes mellitus, hypercholesterolemia, body mass index, estimated glomerular filtration rate, atrial fibrillation, history of stroke, smoking habit, alcohol intake, and regular exercise.

Model 3: adjusted for the covariates included in model 2 plus serum high-sensitivity C-reactive protein.

**Table S2. Risk of dementia with and without incident cardiovascular disease during follow-up period according to serum NT-proBNP levels among subjects without a history of cardiovascular disease and/or dementia at baseline, 2002 to 2012.**

| NT-proBNP (pg/mL)                                        | Persons at risk | No. of events | Hazard ratio (95% CI) |                  |                  |
|----------------------------------------------------------|-----------------|---------------|-----------------------|------------------|------------------|
|                                                          |                 |               | Model 1               | Model 2          | Model 3          |
| <b>Incident dementia without cardiovascular disease*</b> |                 |               |                       |                  |                  |
| ≤54                                                      | 488             | 39            | 1.00 (reference)      | 1.00 (reference) | 1.00 (reference) |
| 55–124                                                   | 563             | 120           | 1.98 (1.37–2.86)      | 1.87 (1.29–2.72) | 1.87 (1.29–2.70) |
| 125–299                                                  | 305             | 90            | 2.22 (1.50–3.30)      | 1.85 (1.23–2.78) | 1.90 (1.27–2.85) |
| ≥300                                                     | 156             | 49            | 3.03 (1.95–4.70)      | 2.68 (1.67–4.32) | 2.82 (1.75–4.56) |
| <i>P</i> for trend                                       |                 |               | <0.001                | <0.001           | <0.001           |
| 1-SD increment in log (serum NT-proBNP levels)           | 1,512           | 298           | 1.41 (1.25–1.59)      | 1.40 (1.21–1.62) | 1.43 (1.24–1.66) |
| <b>Incident dementia with cardiovascular disease†</b>    |                 |               |                       |                  |                  |
| ≤54                                                      | 488             | 7             | 1.00 (reference)      | 1.00 (reference) | 1.00 (reference) |
| 55–124                                                   | 563             | 10            | 1.28 (0.48–3.45)      | 1.14 (0.42–3.08) | 1.14 (0.42–3.09) |
| 125–299                                                  | 305             | 11            | 2.52 (0.93–6.88)      | 1.79 (0.63–5.09) | 1.80 (0.63–5.12) |
| ≥300                                                     | 156             | 8             | 4.19 (1.42–12.37)     | 2.72 (0.77–9.62) | 2.74 (0.77–9.77) |
| <i>P</i> for trend                                       |                 |               | 0.004                 | 0.10             | 0.10             |
| 1-SD increment in log (serum NT-proBNP levels)           | 1,512           | 36            | 1.59 (1.17–2.17)      | 1.34 (0.90–2.00) | 1.34 (0.90–2.00) |

CI, confidence interval; NT-proBNP, N-terminal pro-B-type natriuretic peptide; SD, standard deviation.

The SD of log-transformed NT-proBNP levels (pg/mL) was 1.035.

The exclusion criteria of this analysis were subjects with dementia at baseline, subjects with cardiovascular disease at baseline, and subjects without available serum for measuring the serum NT-proBNP level.

\* Incident dementia without cardiovascular disease was defined as the development of dementia without incident cardiovascular disease before the onset of dementia during follow-up.

† Incident dementia with cardiovascular disease was defined as the development of cardiovascular disease and subsequent dementia during the follow-up period.

Model 1: adjusted for age and sex.

Model 2: adjusted for age, sex, education level, systolic blood pressure, use of antihypertensive agents, use of heart disease agents, diabetes mellitus, hypercholesterolemia, body mass index, estimated glomerular filtration rate, atrial fibrillation, smoking habit, alcohol intake, and regular exercise.

Model 3: adjusted for the covariates included in model 2 plus high-sensitivity C-reactive protein.

**Table S3. Risk of dementia with and without incident diabetes mellitus during the follow-up period according to serum NT-proBNP levels among subjects without a history of diabetes and/or dementia at baseline, 2002 to 2012.**

| NT-proBNP (pg/mL)                                   | Persons at risk | No. of events | Hazard ratio (95% CI) |                   |                    |
|-----------------------------------------------------|-----------------|---------------|-----------------------|-------------------|--------------------|
|                                                     |                 |               | Model 1               | Model 2           | Model 3            |
| <b>Incident dementia without diabetes mellitus*</b> |                 |               |                       |                   |                    |
| ≤54                                                 | 400             | 40            | 1.00 (reference)      | 1.00 (reference)  | 1.00 (reference)   |
| 55–124                                              | 455             | 100           | 1.57 (1.08–2.29)      | 1.45 (1.00–2.12)  | 1.45 (0.99–2.11)   |
| 125–299                                             | 257             | 81            | 1.81 (1.21–2.70)      | 1.42 (0.94–2.15)  | 1.45 (0.96–2.19)   |
| ≥300                                                | 143             | 48            | 2.65 (1.70–4.13)      | 1.97 (1.21–3.22)  | 2.03 (1.24–3.32)   |
| <i>P</i> for trend                                  |                 |               | <0.001                | 0.02              | 0.01               |
| 1-SD increment in log (serum NT-proBNP levels)      | 1,255           | 269           | 1.41 (1.24–1.60)      | 1.33 (1.14–1.56)  | 1.35 (1.15–1.59)   |
| <b>Incident dementia with diabetes mellitus†</b>    |                 |               |                       |                   |                    |
| ≤54                                                 | 400             | 3             | 1.00 (reference)      | 1.00 (reference)  | 1.00 (reference)   |
| 55–124                                              | 455             | 9             | 2.64 (0.70–9.99)      | 2.53 (0.66–9.65)  | 2.52 (0.66–9.60)   |
| 125–299                                             | 257             | 7             | 3.95 (0.96–16.18)     | 3.76 (0.90–15.69) | 3.79 (0.91–15.81)  |
| ≥300                                                | 143             | 6             | 9.18 (2.18–38.62)     | 9.89 (2.17–45.11) | 10.07 (2.19–46.23) |
| <i>P</i> for trend                                  |                 |               | 0.002                 | 0.003             | 0.003              |
| 1-SD increment in log (serum NT-proBNP levels)      | 1,255           | 25            | 1.65 (1.14–2.41)      | 1.86 (1.17–2.97)  | 1.89 (1.17–3.04)   |

CI, confidence interval; NT-proBNP, N-terminal pro-B-type natriuretic peptide; SD, standard deviation.

The SD of log-transformed NT-proBNP levels (pg/mL) was 1.062.

The exclusion criteria of this analysis were subjects with dementia at baseline, subjects with diabetes mellitus at baseline, and subjects without available serum for measuring the serum NT-proBNP level.

\* Incident dementia without diabetes mellitus was defined as the development of dementia without incident diabetes mellitus before the onset of dementia during follow-up.

† Incident dementia with diabetes mellitus was defined as the development of diabetes mellitus and subsequent dementia during the follow-up period.

Model 1: adjusted for age and sex.

Model 2: adjusted for age, sex, education level, systolic blood pressure, use of antihypertensive agents, use of heart disease agents, hypercholesterolemia, body mass index, estimated glomerular filtration rate, atrial fibrillation, history of stroke, smoking habit, alcohol intake, and regular exercise.

Model 3: adjusted for the covariates included in model 2 plus high-sensitivity C-reactive protein.

**Table S4. Reclassification of the 10-year predicted absolute risk of development of dementia, 2002 to 2012.**

| Basic model*                              | Basic model*+ log (NT-proBNP) |             |           | Total |
|-------------------------------------------|-------------------------------|-------------|-----------|-------|
|                                           | Participants, n               |             |           |       |
|                                           | <25% risk                     | 25–50% risk | >50% risk |       |
| Participants who developed dementia       |                               |             |           |       |
| <25% risk                                 | 85                            | 13          | 0         | 98    |
| 25–50% risk                               | 6                             | 108         | 20        | 134   |
| >50% risk                                 | 0                             | 5           | 140       | 145   |
| Total                                     | 91                            | 126         | 160       | 377   |
| Participants who did not develop dementia |                               |             |           |       |
| <25% risk                                 | 786                           | 35          | 0         | 819   |
| 25–50% risk                               | 38                            | 232         | 17        | 287   |
| >50% risk                                 | 0                             | 17          | 135       | 152   |
| Total                                     | 824                           | 282         | 152       | 1,258 |

Net reclassification improvement was estimated as 0.062 ( $Z_{NRI}=3.21$ ,  $P=0.001$ ).

NT-proBNP, N-terminal pro-B-type natriuretic peptide.

\* The basic model included age, sex, education level, systolic blood pressure, use of antihypertensive agents, diabetes mellitus, hypercholesterolemia, body mass index, estimated glomerular filtration rate, atrial fibrillation, history of stroke, smoking habit, alcohol intake, regular exercise, and serum high-sensitivity C-reactive protein.

**Table S5. Predictive ability, reclassification, and discrimination of dementia by serum NT-proBNP, 2002 to 2012.**

|                                                     | Harrell's c-statistics | <i>P</i> value for Harrell's c-statistics difference | Continuous NRI (95% CI) | <i>P</i> value for NRI | IDI (95% CI)           | <i>P</i> value for IDI |
|-----------------------------------------------------|------------------------|------------------------------------------------------|-------------------------|------------------------|------------------------|------------------------|
| Framingham risk score*                              | 0.749                  | <0.001                                               | 0.190<br>(0.076–0.305)  | 0.001                  | 0.017<br>(0.007–0.026) | <0.001                 |
| Framingham risk score*+log (serum NT-proBNP levels) | 0.767                  |                                                      |                         |                        |                        |                        |
| CAIDE risk score†                                   | 0.568                  | <0.001                                               | 0.427<br>(0.314–0.540)  | <0.001                 | 0.058<br>(0.042–0.073) | <0.001                 |
| CAIDE risk score†+log (serum NT-proBNP levels)      | 0.686                  |                                                      |                         |                        |                        |                        |

CI, confidence interval; IDI, integrated discrimination improvement; NRI, net reclassification improvement; NT-proBNP, N-terminal pro-B-type natriuretic peptide.

\* The Framingham risk score included age, marital status, body mass index, stroke, diabetes, and cancer (ischemic attack omitted).

† The CAIDE risk score included age, education status, sex, systolic blood pressure, body mass index, total cholesterol, and physical activity.

**Table S6. Risk of dementia and its subtypes according to serum NT-proBNP levels, after the exclusion of subjects whose events occurred within 3 years after baseline, 2002 to 2012.**

| NT-proBNP (pg/mL)          | Persons at risk | No. of events | Hazard ratio (95% CI) |                  |                  |
|----------------------------|-----------------|---------------|-----------------------|------------------|------------------|
|                            |                 |               | Model 1               | Model 2          | Model 3          |
| <b>All-cause dementia</b>  |                 |               |                       |                  |                  |
| ≤54                        | 514             | 51            | 1.00 (reference)      | 1.00 (reference) | 1.00 (reference) |
| 55–124                     | 595             | 121           | 1.70 (1.21–2.37)      | 1.57 (1.12–2.19) | 1.56 (1.12–2.19) |
| 125–299                    | 336             | 88            | 1.83 (1.27–2.64)      | 1.49 (1.03–2.17) | 1.53 (1.05–2.22) |
| ≥300                       | 190             | 42            | 2.34 (1.53–3.57)      | 1.79 (1.11–2.89) | 1.83 (1.13–2.97) |
| <i>P</i> for trend         |                 |               | <0.001                | 0.03             | 0.01             |
| <b>Alzheimer's disease</b> |                 |               |                       |                  |                  |
| ≤54                        | 514             | 28            | 1.00 (reference)      | 1.00 (reference) | 1.00 (reference) |
| 55–124                     | 595             | 89            | 2.05 (1.33–3.17)      | 2.00 (1.30–3.09) | 1.99 (1.29–3.08) |
| 125–299                    | 336             | 59            | 1.89 (1.18–3.04)      | 1.72 (1.06–2.78) | 1.77 (1.09–2.87) |
| ≥300                       | 190             | 25            | 2.27 (1.30–3.96)      | 2.04 (1.10–3.77) | 2.12 (1.14–3.94) |
| <i>P</i> for trend         |                 |               | 0.01                  | 0.045            | 0.03             |
| <b>Vascular dementia</b>   |                 |               |                       |                  |                  |
| ≤54                        | 514             | 13            | 1.00 (reference)      | 1.00 (reference) | 1.00 (reference) |
| 55–124                     | 595             | 26            | 1.70 (0.86–3.35)      | 1.48 (0.75–2.92) | 1.48 (0.75–2.91) |
| 125–299                    | 336             | 29            | 3.27 (1.64–6.50)      | 2.28 (1.12–4.65) | 2.34 (1.15–4.76) |
| ≥300                       | 190             | 11            | 3.13 (1.36–7.16)      | 1.84 (0.70–4.84) | 1.88 (0.71–4.95) |
| <i>P</i> for trend         |                 |               | <0.001                | 0.048            | 0.04             |

CI, confidence interval; NT-proBNP, N-terminal pro-B-type natriuretic peptide.

Model 1: adjusted for age and sex.

Model 2: adjusted for age, sex, education level, systolic blood pressure, use of antihypertensive agents, use of heart disease agents, diabetes mellitus, hypercholesterolemia, body mass index, estimated glomerular filtration rate, atrial fibrillation, history of stroke, smoking habit, alcohol intake, and regular exercise.

Model 3: adjusted for the covariates included in model 2 plus serum high-sensitivity C-reactive protein.

**Table S7. Risk of dementia and its subtypes according to serum NT-proBNP levels, after the exclusion of subjects with cancer or chronic renal failure, 2002 to 2012.**

| NT-proBNP (pg/mL)          | Persons at risk | No. of events | Hazard ratio (95% CI) |                  |                  |
|----------------------------|-----------------|---------------|-----------------------|------------------|------------------|
|                            |                 |               | Model 1               | Model 2          | Model 3          |
| <b>All-cause dementia</b>  |                 |               |                       |                  |                  |
| ≤54                        | 476             | 51            | 1.00 (reference)      | 1.00 (reference) | 1.00 (reference) |
| 55–124                     | 547             | 127           | 1.70 (1.22–2.37)      | 1.59 (1.14–2.22) | 1.58 (1.13–2.20) |
| 125–299                    | 299             | 102           | 2.03 (1.43–2.90)      | 1.65 (1.14–2.38) | 1.69 (1.17–2.43) |
| ≥300                       | 160             | 61            | 3.10 (2.10–4.57)      | 2.62 (1.72–4.00) | 2.72 (1.78–4.17) |
| <i>P</i> for trend         |                 |               | <0.001                | <0.001           | <0.001           |
| <b>Alzheimer's disease</b> |                 |               |                       |                  |                  |
| ≤54                        | 476             | 29            | 1.00 (reference)      | 1.00 (reference) | 1.00 (reference) |
| 55–124                     | 547             | 93            | 2.01 (1.31–3.06)      | 1.95 (1.27–2.98) | 1.93 (1.26–2.96) |
| 125–299                    | 299             | 67            | 2.01 (1.27–3.17)      | 1.82 (1.14–2.91) | 1.90 (1.19–3.04) |
| ≥300                       | 160             | 31            | 2.51 (1.48–4.24)      | 2.53 (1.44–4.44) | 2.81 (1.59–4.95) |
| <i>P</i> for trend         |                 |               | 0.002                 | 0.005            | 0.001            |
| <b>Vascular dementia</b>   |                 |               |                       |                  |                  |
| ≤54                        | 476             | 13            | 1.00 (reference)      | 1.00 (reference) | 1.00 (reference) |
| 55–124                     | 547             | 26            | 1.58 (0.80–3.10)      | 1.43 (0.72–2.81) | 1.42 (0.72–2.81) |
| 125–299                    | 299             | 34            | 3.45 (1.76–6.74)      | 2.40 (1.19–4.81) | 2.40 (1.20–4.84) |
| ≥300                       | 160             | 24            | 5.85 (2.89–11.84)     | 3.63 (1.67–7.92) | 3.64 (1.67–7.94) |
| <i>P</i> for trend         |                 |               | <0.001                | <0.001           | <0.001           |

CI, confidence interval; NT-proBNP, N-terminal pro-B-type natriuretic peptide.

Model 1: adjusted for age and sex.

Model 2: adjusted for age, sex, education level, systolic blood pressure, use of antihypertensive agents, use of heart disease agents, diabetes mellitus, hypercholesterolemia, body mass index, estimated glomerular filtration rate, atrial fibrillation, history of stroke, smoking habit, alcohol intake, and regular exercise.

Model 3: adjusted for the covariates included in model 2 plus serum high-sensitivity C-reactive protein.



**Table S8. Risk of dementia and its subtypes according to serum NT-proBNP levels, after the exclusion of subjects with hormone replacement therapy, 2002 to 2012.**

| NT-proBNP (pg/mL)          | Persons at risk | No. of events | Hazard ratio (95% CI) |                  |                  |
|----------------------------|-----------------|---------------|-----------------------|------------------|------------------|
|                            |                 |               | Model 1               | Model 2          | Model 3          |
| <b>All-cause dementia</b>  |                 |               |                       |                  |                  |
| ≤54                        | 514             | 55            | 1.00 (reference)      | 1.00 (reference) | 1.00 (reference) |
| 55–124                     | 592             | 141           | 1.76 (1.28–2.42)      | 1.67 (1.21–2.30) | 1.67 (1.21–2.29) |
| 125–299                    | 336             | 111           | 2.03 (1.44–2.85)      | 1.65 (1.16–2.34) | 1.69 (1.19–2.40) |
| ≥300                       | 190             | 70            | 3.02 (2.08–4.38)      | 2.38 (1.58–3.58) | 2.46 (1.63–3.72) |
| <i>P</i> for trend         |                 |               | <0.001                | <0.001           | <0.001           |
| <b>Alzheimer's disease</b> |                 |               |                       |                  |                  |
| ≤54                        | 514             | 32            | 1.00 (reference)      | 1.00 (reference) | 1.00 (reference) |
| 55–124                     | 592             | 104           | 2.04 (1.36–3.05)      | 2.01 (1.34–3.01) | 2.00 (1.33–3.00) |
| 125–299                    | 336             | 75            | 2.03 (1.32–3.14)      | 1.82 (1.17–2.84) | 1.90 (1.22–2.96) |
| ≥300                       | 190             | 36            | 2.42 (1.47–3.97)      | 2.23 (1.31–3.82) | 2.43 (1.41–4.16) |
| <i>P</i> for trend         |                 |               | 0.001                 | 0.01             | 0.003            |
| <b>Vascular dementia</b>   |                 |               |                       |                  |                  |
| ≤54                        | 514             | 13            | 1.00 (reference)      | 1.00 (reference) | 1.00 (reference) |
| 55–124                     | 592             | 28            | 1.73 (0.89–3.37)      | 1.58 (0.81–3.08) | 1.58 (0.81–3.08) |
| 125–299                    | 336             | 35            | 3.53 (1.82–6.88)      | 2.51 (1.26–5.00) | 2.52 (1.26–5.04) |
| ≥300                       | 190             | 26            | 5.92 (2.95–11.91)     | 3.54 (1.63–7.69) | 3.56 (1.64–7.73) |
| <i>P</i> for trend         |                 |               | <0.001                | <0.001           | <0.001           |

CI, confidence interval; NT-proBNP, N-terminal pro-B-type natriuretic peptide.

Model 1: adjusted for age and sex.

Model 2: adjusted for age, sex, education level, systolic blood pressure, use of antihypertensive agents, use of heart disease agents, diabetes mellitus, hypercholesterolemia, body mass index, estimated glomerular filtration rate, atrial fibrillation, history of stroke, smoking habit, alcohol intake, and regular exercise.

Model 3: adjusted for the covariates included in model 2 plus serum high-sensitivity C-reactive protein.
